# Supplementary material for: Insight into ferrihydrite effects on methanogenesis in UASB reactors treating high sulfate wastewater: reactor performance and microbial community
Source: Royal Society of Chemistry journal article supplement (doi:10.1039/d0ew00154f), 2020-01-01
Supplement: d0ew00154f1.pdf [file d0ew00154f1.pdf]

1 Insight into Ferrihydrite Effects on  
2 Methanogenesis in UASB Reactor Treating  
3 High Sulfate Wastewater: Reactor Performance  
4 and Microbial Community

5

6 **Authors:**

7 Zhen Jin, Zhiqiang Zhao and Yaobin Zhang\*

8

9 **Affiliations:**

10 Key Laboratory of Industrial Ecology and Environmental Engineering (Dalian  
11 University of Technology), Ministry of Education, School of Environmental Science  
12 and Technology, Dalian University of Technology, Dalian 116024, China.

13

14 \* **Correspondence:** Tel: +86 411 8470 6460, Fax: +86 411 8470 6263;

15 E-mail address: zhangyb@dlut.edu.cn

16 Supporting Information: 4 pages, 3 figures.

17

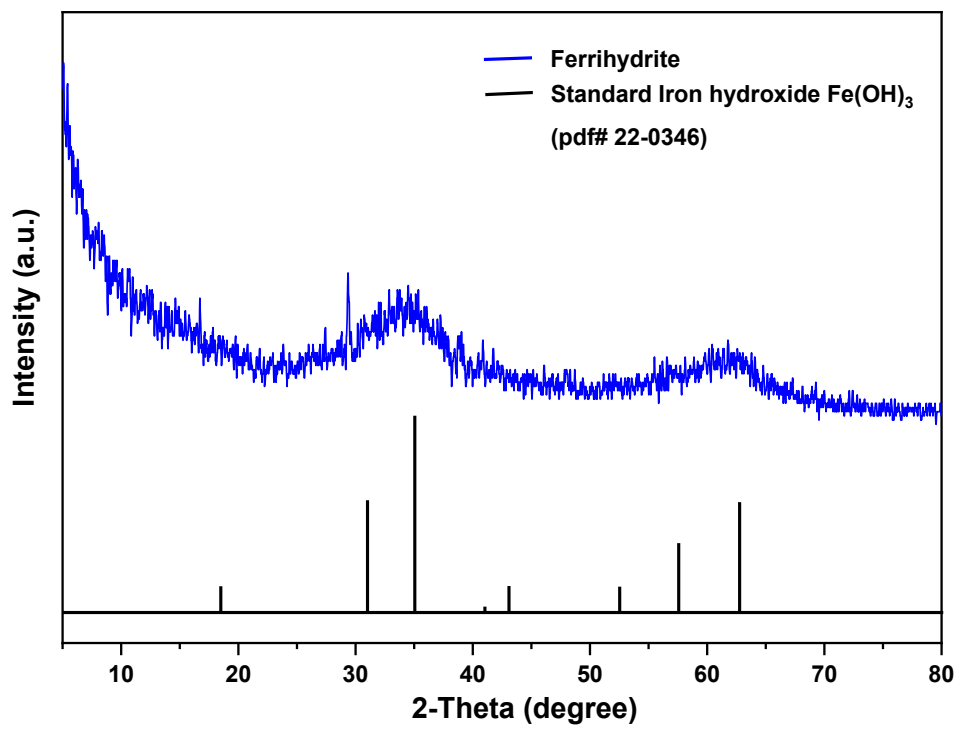

18

19

Figure S1. XRD of synthetic ferrihydrite.

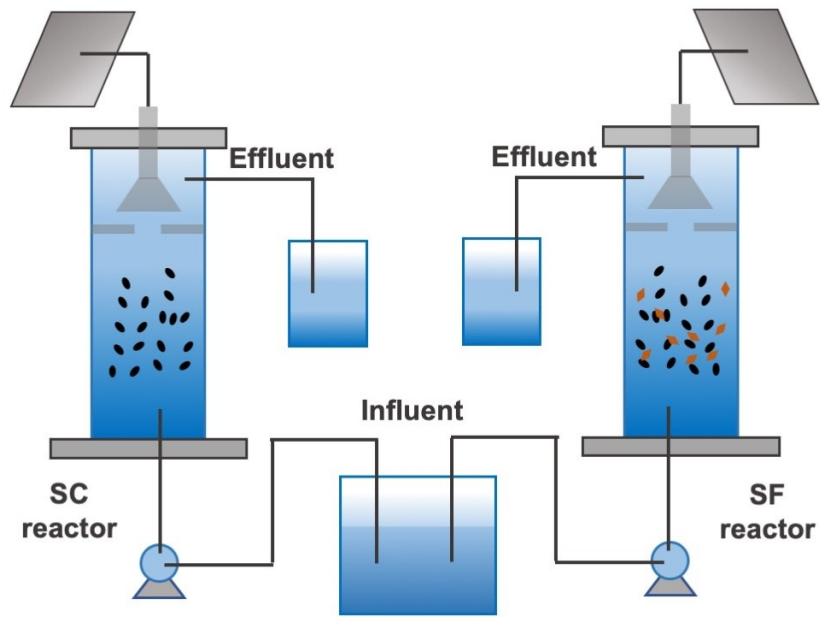

20

21

**Figure S2.** Schematic diagram of the SC and SF reactors setup

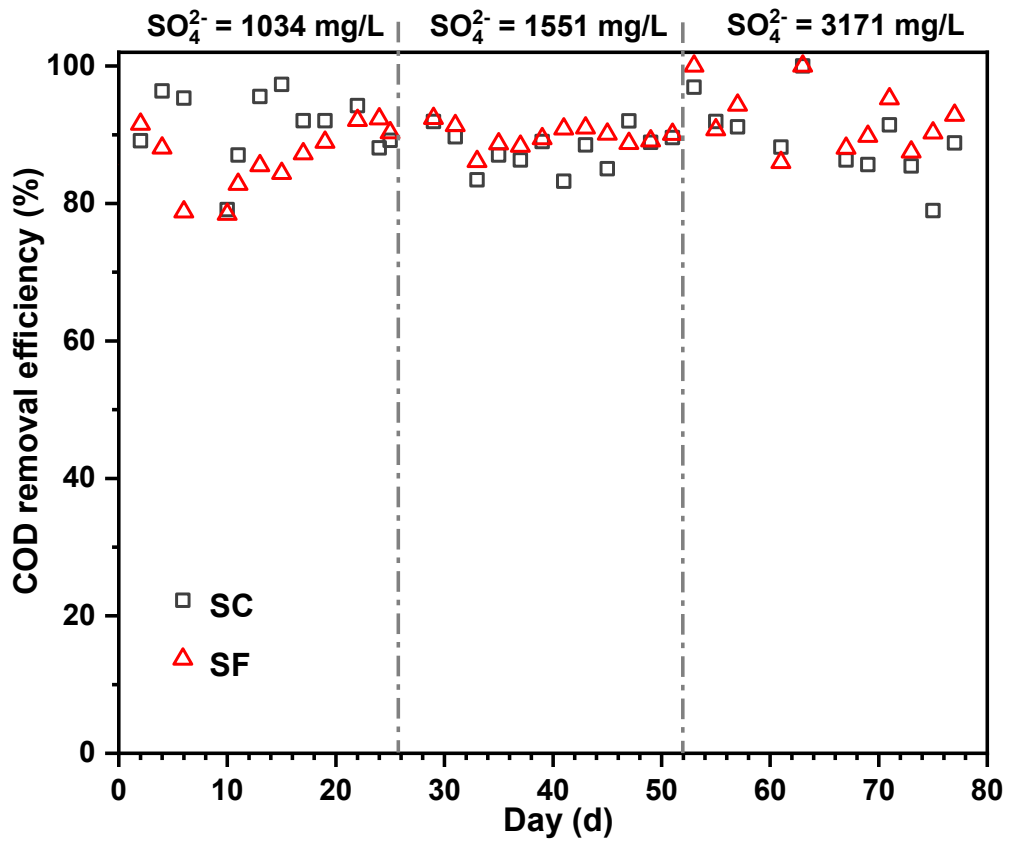

23

24

25

26

Figure S3. COD removal efficiency in SC and SF reactors during 78-day operation.
